# Supplementary material
Source: Research Square preprint supplement (doi:10.21203/rs.3.rs-9449847/v1)
Supplement: Supplementary file 1 [file 350c6bcb3ff25eb48e25fa66.docx]

**Table 5:** Land use Change Matrix between 1986 and 2026
