# Supplementary material
Source: Research Square preprint supplement (doi:10.21203/rs.3.rs-9449847/v1)

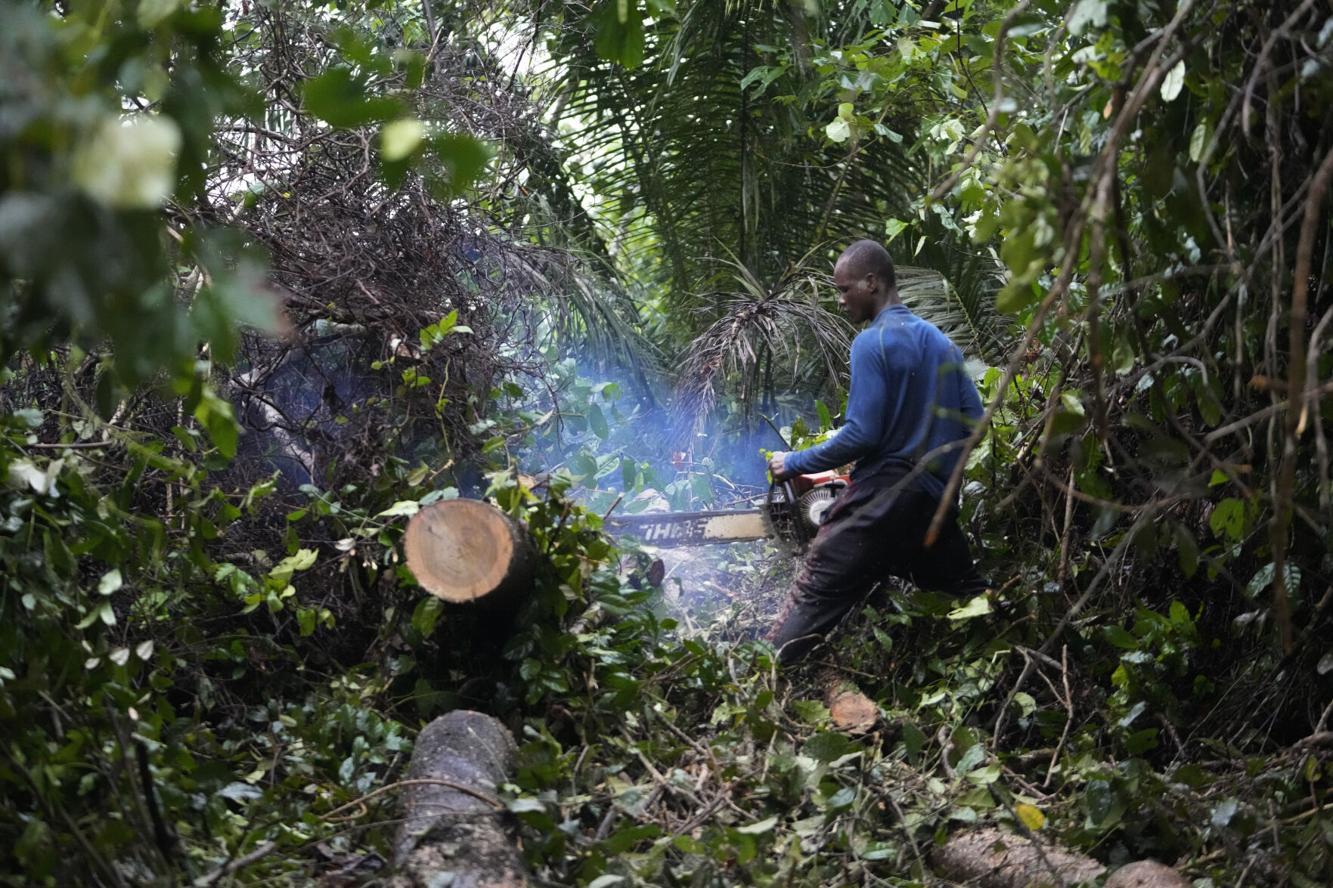


**Plate 1: Uncoordinated logging in the study area (source: Author 2017)**

Supplement: Supplementary file 2 [file 840b793cd6f514893df32225.docx]
